# Supplementary material for: Analysis of Cyp51 protein sequences shows 4 major Cyp51 gene family groups across fungi
Source: PubMed Central journal article supplement (PMC9635630; doi:10.1093/g3journal/jkac249), 2022-09-21
Supplement: jkac249_figure_s1.pdf [file jkac249_figure_s1.pdf]

Tree scale: 1

Legend

- Human Cyp51
- Cyp51
- Cyp51A
- Cyp51B
- Cyp51C

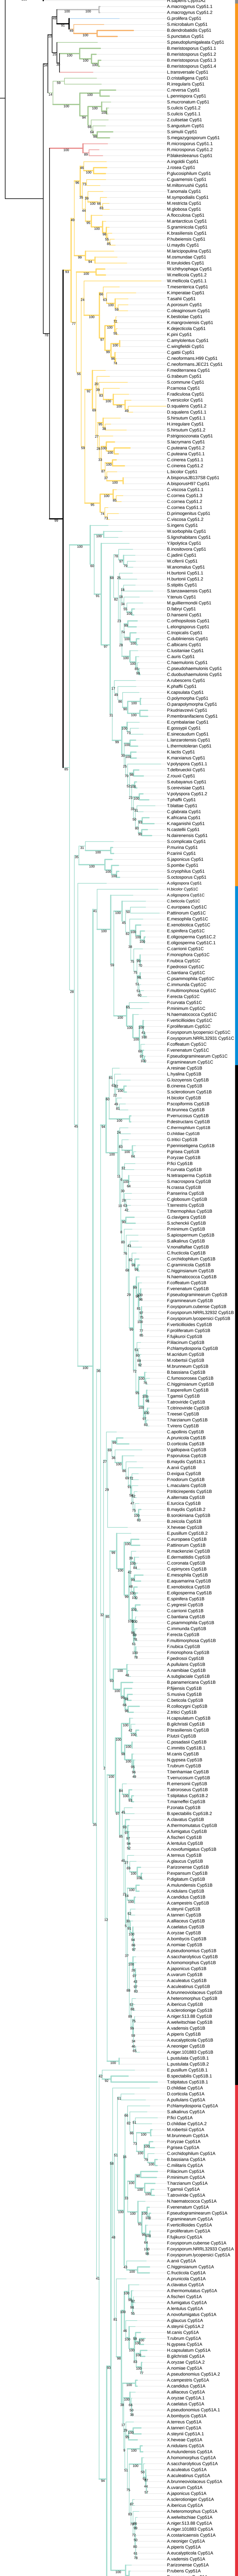

H.sapiens Cyp51A1  
H.sapiens Cyp51A2  
A.macrogynus Cyp51.1  
A.macrogynus Cyp51.2  
B.microbalum Cyp51  
B.dendrobatis Cyp51  
S.pseudoplumigaleata Cyp51  
B.meristosporus Cyp51.1  
B.meristosporus Cyp51.2  
B.meristosporus Cyp51.3  
L.transversale Cyp51  
D.cristalligena Cyp51  
R.irregularis Cyp51  
C.reversa Cyp51  
L.pennispora Cyp51  
S.mucronatum Cyp51  
S.culicis Cyp51.2  
S.culicis Cyp51.1  
Z.culisetae Cyp51  
S.angustum Cyp51  
S.simulii Cyp51  
S.megazygosporum Cyp51  
R.microspor Cyp51.1  
R.microspor Cyp51.2  
P.blakesleeanus Cyp51  
A.ingoldii Cyp51  
J.rosea Cyp51  
P.glucosiphilum Cyp51  
C.quilensis Cyp51  
M.miltonrushi Cyp51  
T.anomala Cyp51  
M.sympodialis Cyp51  
M.restricta Cyp51  
M.globosa Cyp51  
A.floucolosa Cyp51  
M.antarcticus Cyp51  
S.graminicola Cyp51  
K.brasiliensis Cyp51  
P.hubeiensis Cyp51  
U.maydis Cyp51  
M.laricipollina Cyp51  
M.osmundae Cyp51  
R.turidoides Cyp51  
W.ichthyophaga Cyp51  
W.melicola Cyp51.2  
W.melicola Cyp51.1  
T.mesenterica Cyp51  
K.imperatae Cyp51  
T.sahii Cyp51  
A.porosum Cyp51  
C.oleaginosum Cyp51  
K.bestioleae Cyp51  
K.mangroviensis Cyp51  
K.dejecticola Cyp51  
K.pini Cyp51  
C.amylolentus Cyp51  
C.wingfieldii Cyp51  
C.gattii Cyp51  
C.neoformans H99 Cyp51  
C.neoformans JEC21 Cyp51  
F.mediterranea Cyp51  
G.trabeum Cyp51  
S.commune Cyp51  
P.carnosa Cyp51  
Fradiculosa Cyp51  
Tversicolor Cyp51  
D.squalens Cyp51.2  
D.squalens Cyp51.1  
S.hirsutum Cyp51.1  
H.irregularis Cyp51  
S.hirsutum Cyp51.2  
P.strigosozonata Cyp51  
S.lacrymans Cyp51  
C.puteana Cyp51.2  
C.puteana Cyp51.1  
C.cinerea Cyp51.1  
C.cinerea Cyp51.2  
L.bicolor Cyp513758 Cyp51  
A.bisporus H97 Cyp51  
C.viscosa Cyp51.1  
C.cornea Cyp51.3  
C.cornea Cyp51.2  
C.cornea Cyp51.1  
D.primogenitus Cyp51  
C.viscosa Cyp51.2  
S.ingens Cyp51  
W.sorbophila Cyp51  
S.lignohabitanus Cyp51  
Y.lypoltica Cyp51  
B.inositovora Cyp51  
C.jadinii Cyp51  
W.ciferrii Cyp51  
W.anomalus Cyp51  
H.burtonii Cyp51.1  
H.burtonii Cyp51.2  
S.stipitis Cyp51  
S.tanzawaensis Cyp51  
Y.tenuis Cyp51  
M.guilliermondii Cyp51  
D.fabryi Cyp51  
D.hanseni Cyp51  
C.orthopsilosis Cyp51  
L.elongisporus Cyp51  
C.tropicalis Cyp51  
C.dubliniensis Cyp51  
C.albicans Cyp51  
C.lusitanae Cyp51  
C.auris Cyp51  
C.haemulonius Cyp51  
C.pseudohaemulonius Cyp51  
C.duobushaemulonius Cyp51  
A.rubescens Cyp51  
K.phaffii Cyp51  
K.capsulata Cyp51  
O.polymorpha Cyp51  
O.parapolyomorpha Cyp51  
P.kudriavzevii Cyp51  
P.membranifaciens Cyp51  
E.cymbalariae Cyp51  
E.gossypii Cyp51  
E.sinecaudum Cyp51  
L.lanzarotensis Cyp51  
L.thermotolerans Cyp51  
K.lactis Cyp51  
K.marxianus Cyp51  
V.polyspora Cyp51.1  
T.delbrueckii Cyp51  
Z.rouxii Cyp51  
S.eubayanus Cyp51  
S.cerevisiae Cyp51  
V.polyspora Cyp51.2  
T.phaffii Cyp51  
T.blatae Cyp51  
C.glabrata Cyp51  
K.africana Cyp51  
K.naganishii Cyp51  
N.castellii Cyp51  
N.dairenensis Cyp51  
S.complicata Cyp51  
P.murina Cyp51  
P.carinii Cyp51  
S.japonicus Cyp51  
S.pombe Cyp51  
S.cryophilus Cyp51  
S.octosporus Cyp51  
A.oligospora Cyp51  
H.bicolor Cyp51C  
A.oligospora Cyp51C  
C.beticola Cyp51C  
C.europaea Cyp51C  
Pattinorum Cyp51C  
E.mesophila Cyp51C  
E.xenobiotica Cyp51C  
E.spinifera Cyp51C  
E.oligosperma Cyp51C.2  
E.oligosperma Cyp51C.1  
C.carrionii Cyp51C  
F.monophora Cyp51C  
F.nubica Cyp51C  
F.pedrosoi Cyp51C  
C.bantiana Cyp51C  
C.psammodi Cyp51C  
C.immunda Cyp51C  
F.multimorphosa Cyp51C  
F.erecta Cyp51C  
P.curvata Cyp51C  
P.minimum Cyp51C  
N.haematococca Cyp51C  
F.verticillioideus Cyp51C  
F.prolifera Cyp51C  
F.oxysporum.lycopersici Cyp51C  
F.oxysporum.NRRL32932 Cyp51C  
F.affinis Cyp51C  
F.venenatum Cyp51C  
F.pseudograminearum Cyp51C  
A.resinae Cyp51B  
L.hyalina Cyp51B  
G.foxyensis Cyp51B  
B.cinerea Cyp51B  
S.sclerotium Cyp51B  
H.bicolor Cyp51B  
P.scopiformis Cyp51B  
M.brunnea Cyp51B  
P.verrucosus Cyp51B  
D.destructans Cyp51B  
C.thermophilum Cyp51B  
D.chilidae Cyp51B  
F.ritici Cyp51B  
P.pennisetigera Cyp51B  
P.ariosa Cyp51B  
P.oryzae Cyp51B  
P.fici Cyp51B  
P.curvata Cyp51B  
N.tetrasperma Cyp51B  
S.macrospora Cyp51B  
N.crassa Cyp51B  
Panseria Cyp51B  
C.globosum Cyp51B  
T.terrestris Cyp51B  
T.thermophilus Cyp51B  
G.clavigera Cyp51B  
S.schenckii Cyp51B  
P.minimum Cyp51B  
S.apiospermum Cyp51B  
S.alkalinus Cyp51B  
V.nonalfalfae Cyp51B  
C.fructicola Cyp51B  
C.orchidophilum Cyp51B  
C.graminicola Cyp51B  
C.higginsianum Cyp51B  
N.haematococca Cyp51B  
F.venenatum Cyp51B  
F.pseudograminearum Cyp51B  
F.graminearum Cyp51B  
F.oxysporum.cubense Cyp51B  
F.oxysporum.NRRL32932 Cyp51B  
F.oxysporum.lycopersici Cyp51B  
F.verticillioideus Cyp51B  
F.prolifera Cyp51B  
F.fujikuroi Cyp51B  
P.chlamydosporia Cyp51B  
M.acridum Cyp51B  
M.robertsii Cyp51B  
M.brunneum Cyp51B  
B.bassiana Cyp51B  
C.tumulososa Cyp51B  
C.higginsianum Cyp51B  
T.asperellum Cyp51B  
T.gamsii Cyp51B  
T.atroviride Cyp51B  
T.citrinoviride Cyp51B  
T.reesei Cyp51B  
T.harzianum Cyp51B  
T.virens Cyp51B  
C.apollinis Cyp51B  
A.prunicola Cyp51B  
D.corticola Cyp51B  
V.gallopava Cyp51B  
P.sporulosa Cyp51B  
B.maydis Cyp51B.1  
A.arxii Cyp51B  
D.exigua Cyp51B  
P.nodorum Cyp51B  
L.maculans Cyp51B  
P.triticirepentis Cyp51B  
A.alternata Cyp51B  
E.turcica Cyp51B  
B.maydis Cyp51B.2  
B.sorokiniana Cyp51B  
B.zeicola Cyp51B  
X.heveae Cyp51B  
E.pusillum Cyp51B.2  
C.europaea Cyp51B  
Pattinorum Cyp51B  
R.mackenziesii Cyp51B  
E.dermatitidis Cyp51B  
C.coronata Cyp51B  
C.epimyces Cyp51B  
E.mesophila Cyp51B  
E.aquamarina Cyp51B  
E.xenobiotica Cyp51B  
E.oligosperma Cyp51B  
E.spinifera Cyp51B  
C.carrionii Cyp51B  
C.bantiana Cyp51B  
C.psammodi Cyp51B  
C.immunda Cyp51B  
F.erecta Cyp51B  
F.multimorphosa Cyp51B  
F.nubica Cyp51B  
F.monophora Cyp51B  
F.pedrosoi Cyp51B  
A.pullulans Cyp51B  
A.nambicae Cyp51B  
A.subglaciale Cyp51B  
B.panamericana Cyp51B  
P.fijiensis Cyp51B  
S.musiva Cyp51B  
C.beticola Cyp51B  
R.collocygni Cyp51B  
Z.ritici Cyp51B  
H.capsulatum Cyp51B  
B.gilchristii Cyp51B  
P.lutizii Cyp51B  
C.posadasii Cyp51B  
C.immitis Cyp51B.1  
M.canis Cyp51B  
N.gypsea Cyp51B  
T.rubrum Cyp51B  
T.benhamiae Cyp51B  
T.verrucosum Cyp51B  
R.emersonii Cyp51B  
T.atroseus Cyp51B  
T.stipitatus Cyp51B.2  
T.marneffei Cyp51B  
P.zonata Cyp51B  
B.spectabilis Cyp51B.2  
A.clavatus Cyp51B  
A.thermomutatus Cyp51B  
A.fischeri Cyp51B  
A.fumigatus Cyp51B  
A.lentulus Cyp51B  
A.novofumigatus Cyp51B  
A.terreus Cyp51B  
A.glaucus Cyp51B  
P.arizonense Cyp51B  
P.expansum Cyp51B  
P.digitatum Cyp51B  
A.mulundensis Cyp51B  
A.nidulans Cyp51B  
A.candidus Cyp51B  
A.campestris Cyp51B  
A.steynii Cyp51B  
A.tanneri Cyp51B  
A.alliaceus Cyp51B  
A.caelatus Cyp51B  
A.oryzae Cyp51B  
A.bombycis Cyp51B  
A.nomiae Cyp51B  
A.pseudonidomius Cyp51B  
A.saccharolyticus Cyp51B  
A.homomorphus Cyp51B  
A.japonicus Cyp51B  
A.uvarum Cyp51B  
A.aculeatus Cyp51B  
A.aculeatus Cyp51B  
A.brunneoviolaceus Cyp51B  
A.heteromorphus Cyp51B  
A.ibericus Cyp51B  
A.sclerotionige Cyp51B  
A.niger.513.88 Cyp51B  
A.welwitschiae Cyp51B  
A.vadensis Cyp51B  
A.piperis Cyp51B  
A.eucalypticola Cyp51B  
A.neonyger Cyp51B  
A.niger.101883 Cyp51B  
L.pustulata Cyp51B.1  
L.pustillum Cyp51B.2  
B.spectabilis Cyp51B.1  
T.stipitatus Cyp51B.1  
D.cinifolia Cyp51A  
D.corticola Cyp51A  
A.pullulans Cyp51A  
P.chlamydosporia Cyp51A  
S.alkalinus Cyp51A  
P.fici Cyp51A  
D.chilidae Cyp51A.2  
M.robertsii Cyp51A  
M.brunneum Cyp51A  
P.oryzae Cyp51A  
P.grisea Cyp51A  
C.orchidophilum Cyp51A  
C.bassiana Cyp51A  
C.mittaris Cyp51A  
P.iliacium Cyp51A  
P.minimum Cyp51A  
T.harzianum Cyp51A  
T.gamsii Cyp51A  
T.atroviride Cyp51A  
N.haematococca Cyp51A  
F.venenatum Cyp51A  
F.pseudograminearum Cyp51A  
F.graminearum Cyp51A  
F.verticillioideus Cyp51A  
F.prolifera Cyp51A  
F.fujikuroi Cyp51A  
F.oxysporum.cubense Cyp51A  
F.oxysporum.NRRL32933 Cyp51A  
F.oxysporum.lycopersici Cyp51A  
A.arxii Cyp51A  
C.higginsianum Cyp51A  
C.fructicola Cyp51A  
A.prunicola Cyp51A  
A.clavatus Cyp51A  
A.thermomutatus Cyp51A  
A.fischeri Cyp51A  
A.fumigatus Cyp51A  
A.lentulus Cyp51A  
A.novofumigatus Cyp51A  
A.glaucus Cyp51A  
A.steynii Cyp51A.2  
M.canis Cyp51A  
T.rubrum Cyp51A  
N.gypsea Cyp51A  
H.capsulatum Cyp51A  
B.gilchristii Cyp51A  
A.oryzae Cyp51A.2  
A.nomiae Cyp51A  
A.pseudonidomius Cyp51A.2  
A.campestris Cyp51A  
A.campestris Cyp51A  
A.alliaceus Cyp51A  
A.oryzae Cyp51A.1  
A.pseudonidomius Cyp51A.1  
A.bombycis Cyp51A  
A.terreus Cyp51A  
A.tanneri Cyp51A  
A.steynii Cyp51A.1  
X.heveae Cyp51A  
A.nidulans Cyp51A  
A.mulundensis Cyp51A  
A.saccharolyticus Cyp51A  
A.saccharolyticus Cyp51A  
A.aculeatus Cyp51A  
A.aculeatus Cyp51A  
A.brunneoviolaceus Cyp51A  
A.uvarum Cyp51A  
A.japonicus Cyp51A  
A.sclerotioniger Cyp51A  
A.ibericus Cyp51A  
A.heteromorphus Cyp51A  
A.welwitschiae Cyp51A  
A.niger.513.88 Cyp51A  
A.niger.101883 Cyp51A  
A.costaricensis Cyp51A  
A.piperis Cyp51A  
A.eucalypticola Cyp51A  
A.vadensis Cyp51A  
P.arizonense Cyp51A  
P.rubens Cyp51A  
P.expansum Cyp51A  
P.digitatum Cyp51A  
C.immitis Cyp51A  
C.posadasii Cyp51A
